# Supplementary material for: Immunological memory to hyperphosphorylated tau in asymptomatic individuals
Source: Acta Neuropathol. 2017 Mar 24;133(5):767–83. doi: 10.1007/s00401-017-1705-y (PMC5390017; doi:10.1007/s00401-017-1705-y)
Supplement: Supplementary file 5 — Supplementary material 5 (DOCX 21 kb) [file 401_2017_1705_MOESM5_ESM.docx]

**Table S4.** **Data collection and refinement statistics for human anti-tau Fabs**

| Data set | CBTAU-7.1 | CBTAU-22.1 |
| --- | --- | --- |
| Space group | P41 | P21 |
| Unit cell (Å) | *a* = *b* = 83.9,  *c* = 109.4 | *a* = 52.5,  *b* = 67.2,  *c* = 62.5 |
| *β* angle (deg.) |  | *β* = 94.4 |
| Resolution (Å) a | 50.0-2.30  (2.34-2.30) | 50.0-1.64  (1.67-1.64) |
| X-ray source | ALS 5.0.3 | APS 23ID-B |
| Unique reflections | 33,665 | 53,078 |
| Redundancy a | 7.1 (6.4) | 3.7 (3.5) |
| Average I/σ(I) a | 52.1 (2.9) | 23.7 (1.7) |
| Completeness a | 99.9 (100) | 99.9 (100) |
| *R*syma,b | 0.07 (0.79) | 0.08 (0.66) |
| *R*pima,b | 0.03 (0.34) | 0.05 (0.41) |
| CC1/2 a,c | 0.999 (0.821) | 0.995 (0.684) |
| Fabs in a.u. | 1 | 1 |
| *V*m (Å3/Da) | 3.9 | 2.2 |
| Reflections (work/free) | 31,904/1,704 | 50,354/2,696 |
| *R*crystd | 0.171 | 0.176 |
| *R*freee | 0.224 | 0.217 |
| Refined atoms  Fab  Waters | 3,313  87 | 3,351  462 |
| *B*-values (Å2)  Fab  Waters  Sulfates | 71  61  - | 25  37  26 |
| Wilson *B*-values (Å2) | 62 | 20 |
| R.m.s.d. bond (Å) | 0.009 | 0.007 |
| R.m.s.d. angle (deg.) | 1.23 | 1.21 |
| Ramachandran values (%)f | 95.9, 0.2 | 97.7, 0.5 |
| PDB codes | 5V7R | 5V7U |

a.u., asymmetric unit.

a Parentheses denote outer-shell statistics.

b *R*sym = ∑*hkl*∑*i* |*Ihkl,i* - <*Ihkl*>| /∑*hkl*∑*i* *Ihkl,i* and *R*pim = ∑*hkl*[1/(*N*-1)]1/2∑*i* |*Ihkl,i* - <*Ihkl*>| /∑*hkl*∑*i* *Ihkl,i*, where *Ihkl,i* is the scaled intensity of the ith measurement of reflection *h*, *k*, *l*, < *Ihkl*> is the average intensity for that reflection, and *N* is the redundancy.

c CC1/2= Pearson’s correlation coefficient between random half datasets. CC1/2= ρX,Y = cov(X,Y)/σxσy = E[(X-μx)(Y-μy)]/σxσy.

d *R*cryst = ∑*hkl* |*Fo* - *Fc*| / ∑*hkl* |*Fo*|, where *Fo* and *Fc* are the observed and calculated structure factors.

e *R*free was calculated as for *R*cryst, but on 5% of data excluded before refinement.

f The values are percentage of residues in the favored and outliers regions analyzed by MolProbity.
